# Supplementary material for: Hypoxia-Ischemia Induced Age-Dependent Gene Transcription Effects at Two Development Stages in the Neonate Mouse Brain
Source: PubMed Central journal article supplement (PMC7738628; doi:10.3389/fnmol.2020.587815), 2020-12-02
Supplement: Data_Sheet_1.pdf [file Data_Sheet_1.pdf]

## Supplementary Material

### 1. Material and methods

#### 1.1 Design of the study

NMRI mice (Naval Medical Research Institut) purchased from Janvier (Le Genest Saint Isle, France) were housed in controlled temperature, humidity and day/night 12/12 hours cycle, with water and food *ad libitum*.

A total of 376 pups were used for the entire study. 48 sex-matched pools of RNA (n = 6 per group) were constituted at the different ages and time after insult (n = 192 pups; see details below) and 8 sex matched groups (n = 6 per group) of naïve mice at P2 and P15 (n = 48 pups; see details below) were constituted for transcriptome study. Protein study was done in separate groups of brains (n = 40 pups; see details below)

##### Details in HI study

4 points (3h, 6h, 12h, 24h post insult/or controls)  
 2 conditions (HI, Controls)  
 2 ages (P5, P10)  
 3 replicates (groups)/condition  
 6 pups/replicate (3 males and 3 females).  
 Total = 288 pups

##### Details in complement ontogenesis study

2 ages (P2, P15)  
 6 pups/replicate (3 males and 3 females)  
 4 replicates (groups)  
 Total = 48 pups

##### Protein study

2 ages (P5, P10)  
 2 conditions (HI, Controls)  
 6 pups/condition (3 males and 3 females) for protein arrays.  
 4 pups/condition (2 males and 2 females) for Western Blot  
 Total = 40 pups

The question of sex dependent effects of HI was not addressed in this study for the following reasons.

- 1) In a previous behavior study, we did not observed sex dependent HI effects in grownups (Daher et al, 2018).
- 2) While mice at P5 and P10 were validated stage for transposition to human preterm and term neonates (Johnston, 2005; Hagberg et al 2015, Dupré et al 2020), the correspondence was not valid for brain sexual differentiation (Le Dieu-Lugon et al, 2020).

Therefore we did not address the question of sex in this study considering that it would not have allowed to elaborate human transposition of the data.

## 1.2 Hypoxia-Ischemia procedure

Surgery was performed under Isoflurane anesthesia (AbbVie, Arcueil, FRANCE ; 4% induction and 2% maintenance). First, the right common carotid artery was ligated using 8-0 PROLENE™ wire (ETHICON part of JOHNSON & JOHNSON MEDICAL SAS, Issy-les-Moulineaux, France). Afterwards animals were returned for 1h to their dam, and then submitted to 40 min hypoxia (O<sub>2</sub>/N<sub>2</sub> ratio 8/92%). Temperature was maintained throughout surgery by a heating carpet and hypoxia was performed in a humidified and temperature controlled (36°C) device. Naive animals were used as control.

## 1.2 RNA sample preparation and microarray hybridization

Mice pups at each time points and the two ages were taken from at least two different litters. Thus, we compared 12 independent arrays from lesions at P5 and similarly 12 arrays from brains of animals lesioned at P10. Briefly, brains were quickly removed, sectioned on medial line and ipsilateral hemispheres were immediately frozen in liquid nitrogen. RNA extraction was performed in individual hemispheres using NucleoSpin RNA Plus extraction kit (Macherey-Nagel, Hoerd, France) following manufacturer's instructions. Brain tissues were defrosted in 350 µl kit lysis buffer and homogenized using ceramic beads (1.4 mm Ozyme, Montigny le Bretonneaux) for 20s at 50hz. Total RNAs extraction was performed in individual hemispheres with Nucleospin RNA plus kit® according to manufacturer instructions (Macherey-Nagel) with an extraction volume of 350µL and stored at -80°C until use. RNA quantification and quality control was done using a Bioanalyzer 2100 (Agilent technologies) to confirm a yield  $\geq$  825ng, A260/A280  $>$ 1.9 (1.9-2.1) and A260/A230  $>$ 1.8 (1.8-2.5), using Nanodrop 2000c and RNA Integrity Number (RIN) values  $\geq$  9 (scale 1 -10). The same quantity of each individual sample was pooled and concentration set at 100ng/2.5µl for transcriptome experiment.

## 1.3 Transcriptome analyses

rRNA was synthesized from 100 ng total RNA and labeled using Quick Amp Labeling Kit (Agilent Technologies). A total of 825ng of rRNA (Cy3 for control and Cy5 for test) was co-hybridized on microarrays for 17 h at 65°C on Whole Mouse Genome Oligo 4x44K microarrays (G4845A, Agilent Technologies, Les Ulis, France). Raw hybridization data, evaluated on every probe 5 µm array, using Agilent DNA microarray scanner G2565CA (Agilent Technologies), were extracted and normalized using the Lowess method by Feature extraction software (Agilent), then transferred to Genespring® (GX 12.6 software, Agilent Technologies) for data processing and data mining.

Cy3-labeled naïve mice brain tRNA and Cy5-labeled ischemic brain tRNA were co-hybridized in 24 microarrays (5 in Figure 1). All profiling of the four time points after HI at the two developmental ages were performed in three biological replicates. Cy3-labeled P2 tRNA and Cy5-labeled P15 tRNA were co-hybridized in 4 microarrays (4 in Figure 1). In each array, outlier spots and those exhibiting heterogeneous signal on one color were discarded.

Only probes referring to validated genes (described known with Official Gene Symbol) were taken into account. Probes for cRIKEN sequences were excluded from analysis. In case of multiple probes from one gene, the probe exhibiting the highest fold change was used for subsequent analyses.

Interference of HI at P5 with developmentally affected genes was examined considering HI responses at all 4 time points (3h to 24h) and spontaneous development as variations detected under aforementioned criteria between P2 and P5 and between P5 and P10. We chose the P2 stage, a shorter time lapse to P5 than the P5 to P10 period to exclude earlier birth related changes. Similarly; HI effects at P10 interference with development was examined relatively spontaneous evolution between P5 and P10 and between P10 and P15.

## 1.4 Protein analyses

Protein levels were assessed on lesioned hemispheres at 6h or 24h after HI and compared to naive animals using western blot VEGF (anti VEGFA, Santa Cruz; sc152, 1/200), IL1  $\beta$  (Santa Cruz; sc1251, 1/200) and HIF-1 $\alpha$  (Novus Biochemicals, NB-100-479, 1/200).

A larger panel of 111 cytokines was examined by multiplex protein arrays (Mouse XL cytokine array, Proteome Profiler™, R&D systems) under manufacturer instructions. Protein arrays and western blot analyses were performed on sex-matched pools of extracts.

### 1.4.1 Immunoblot determination of VEGF, HIF-1 $\alpha$ , IL1- $\beta$

After SDS-polyacrylamide gel separation, proteins were blotted on polyvinylidene difluoride membranes, incubated with anti VEGFA (Santa Cruz; sc152, 1/200), IL-1 $\beta$  (Santa Cruz; sc1251, 1/200), HIF-1 $\alpha$  (Novus Biochemicals, NB-100-479, 1/200) and  $\beta$ actin (Sigma-Aldrich, A5441, 1/1000). Gel calibration were done using the commercial marker cocktail (Page Ruler™ Prestained Protein Ladder, Thermo Scientific). Revelation was performed using secondary-antibodies coupled to peroxidase and chemoluminescence detection (ECL Plus; Bio-Rad Laboratories, Marnes la Coquette, France). Whole protein detection used tryptophane residue activation on the membrane by UV illumination and analyses were done using a blot analysis system (Image Lab software version 5.2.1 build 11 from Bio-Rad Laboratories).

### 1.4.2 Multiplex cytokine determination

Separate pools of protein samples from X sex-matched brains were prepared for cytokine arrays (Mouse XL cytokine array, Proteome Profiler™, R&D systems) and managed following provider's instructions. Three film expositions (2 min, 10 min and 60 min) were performed to be able to quantify proteins at very different levels in saturated spots. The 60 min exposed films could be used for all quantifications. Intermembrane standardization was performed using standards inserted by the manufacturer.

Image recording was done using a Bio-Rad camera (Imagelab v 5.1) under transmission illumination (see sample image in [supplementary figure 4G](#)). Fold change was calculated as the ratio of spot intensities of HI exposed brain reported to naïve brain in the same exposition.

## 1.5 Data management

### 1.5.1 Statistics

Comparison amplitudes of transcription response to HI in whole series of induction and repression were done by the non parametric Mann and Whitney rank comparisons test, using GraphPad software.

### 1.5.2 Pathway analysis

Genes of interest contributing to seGOterms enrichment were submitted separately to DAVID® to identify the mains axes of core response using GO-terms Kegg pathways and UP\_Keywords enrichment as indexes.

Several pathways not relevant to brain function were excluded from the interpretation: e.g. Aging, Chagas disease...

### 1.5.3 Gene Ontology analysis

Analysis performed at each age/time point identified 59 seGOterms items under the  $10^{-3}$  p value threshold according to the Bonferroni-Hochberg high stringency test and  $FDR < 10\%$ . More than 50% (31/60) seGOterms were observed at the two ages and near all the genes affected contributed to seGOterms enrichment. But only 17.6% of these genes were affected at both ages and the proportion of repressions contributing to seGOterms at P10 was reduced compared to fraction at P5 ( $p = 2.82E-4$ ,

according to Fisher exact test) (**Supplementary Figure 2A**). The proportion of common repressions at 5 and 10 days was even lower ( $p = 2.91E-13$  and  $p = 1.19E-6$  vs proportions at P5 and P10 respectively) indicating that gene repressions induced by HI affected different targets at 5 and 10 days. Time point observation of seGOterms allowed evaluation of kinetics. As previously observed at whole gene level; seGOterms kinetics showed early response at P5 diminishing over the 24h, and biphasic early and late onset response at P10 (**Supplementary Figure 2B**).

## 2. Results

### 2.1 Gene ontology

Six clusters of Biological Processes (BP) appeared at P5 and four at P10 (**Table 2, Figure 8B,C**). i) Inflammatory response, including in common GO:0006954, GO:0045954, GO:0034097 and GO:0030593, although with kinetics differences). Differences occurred on response to IL1 (GO:0071347), and TNF production (GO:0032760) only significant at P10. ii) Immune system process (GO:0002376) exhibited similar higher weight at P10. It was detected only 3h after HI at P5, including 41 genes while it was a lasting process at P10, including 61 genes. iii) Regulation of transcription, especially RNA-polymerase II based mRNA transcription (GO:0045944) was affected early and transiently at P5, while it had early onset, lasting occurrence had finally a higher weight at P10. Few genes in common in P5 and P10 lists (27%), were associated to this GOterm. iv) Apoptotic process (GO:0006915) early recruited 47 genes in P5 brains, while it appeared a lasting phenomenon including 67 genes including mostly anti-apoptotic components (65 genes) in P10 brains (GO:0043066). v) Angiogenesis (GO:0001525) was noticed at the two age showing highly common factors but with completely distinct kinetics. vi) The inhibition of genes of sterol metabolism had high weight and appeared very specific to P5 (GO:0016126 and GO: 0008202). Several other classes appeared in Revigo<sup>®</sup> treemaps, although less firmly associated to GOterms; circadian rhythm at P5, skeletal muscle cell differentiation at both ages and nervous system development at P10, in relation with apoptosis (GO:0043066) and post-synaptic density (GO:0014069) (Figure 8C).

Cell component (CC) GOterms at P5 showed strong association with neuronal cell body and presynaptic membranes (GO:0043025 and GO:0042734) (**Table 2**). The reverse was observed for presynaptic density (GO:0014069) term, indicating discrepant effects of HI at synaptic sites depending on age, and reminding the age discrepancies noted on synaptogenesis IPA pathway (**Figure 6**). Membrane associated seGOterms predominated at P5 whereas more terms were associated to nucleus, including more genes at P10. The CC GO term nucleus (GO:0005634) at P10, included 2.2 fold more genes ( $n = 634$ ) than at P5 and lower p value. Nuclear chromatin term (GO:0000790) appeared significantly enriched at P10 only, in line with transcription effects reported above.

### 2.2 P5 to P10 correlations of effects in commonly regulated genes

393 genes were induced or repressed in both P5 and P10 brains. We have looked at putative correlation between amplitude of regulations and Regulation Index (RI, that also take into account basal expression level and duration of effect) at the 2 ages. Maximum amplitude and RI of inductions appeared highly correlated (Pearson  $r = 0.8769$ ;  $p < 0.0001$ , and  $r = 0.8827$ ;  $p < 0.0001$ , respectively). However, no significant correlation was noted among repression max amplitude ( $r = 0.08264$ ,  $p = 0.8022$ ) and hardly significant among RI ( $0.3775$   $p = 0.0011$ ).

### 2.3 P5 to P10 correlations of effects in isochronically regulated genes

137 genes showed up regulation in P5 and P10 brain with isochronic time course. Respectively 51 genes underwent repression. We have looked at putative correlation between amplitude of inductions (repression), and between the Regulation Index (RI, that also take into account basal expression level and duration of effect) at the 2 ages. Maximum amplitude and RI of inductions appeared highly correlated (Pearson  $r = 0.8847$ ;  $p < 0.0001$ , and  $r = 0.8564$ ;  $p < 0.0001$ , respectively). Conversely no

significant correlation was noted among repression max amplitude ( $r = 0.1457$ ,  $p = 0.3127$ ) and hardly significant among RI ( $0.2822$ ;  $p = 0.0471$ ).

## 2.4 Protein studies

Western blot in P5 and P10 extracts revealed that standardization of protein analyses on actin during development would include some bias (Supplementary figure 4A, B). Conversely, protein arrays standardized on amount of protein deposit and internal standardization would preclude these bias. While western blot repeatedly showed VEGF increase in P5 and P10 brains, in coherence with mRNA data, protein array only show small amplitude decrease at P5 + 6h. As it detected tiny signal, one could imagine that VEGF antibody in array had not the sensitivity of western blot antibody and failed in detecting the protein.

## 3. References

- Daher I., Le Dieu-Lugon B., Lecointre M., Dupre N., Voisin C., Leroux P., Dourmap N., Gonzalez B.J., Marret S., Leroux-Nicollet I., Cleren C. (2018) Time- and sex-dependent efficacy of magnesium sulfate to prevent behavioral impairments and cerebral damage in a mouse model of cerebral palsy. *Neurobiol Dis* 120:151-164. doi:10.1016/j.nbd.2018.08.020
- Hagberg H., Mallard C., Ferriero D.M., Vannucci S.J., Levison S.W., Vexler Z.S., Gressens P. (2015) The role of inflammation in perinatal brain injury. *Nat Rev Neurol* 11:192-208. doi:10.1038/nrneurol.2015.13
- Johnston M.V. (2005) Excitotoxicity in perinatal brain injury. *Brain Pathol* 15:234-240. doi:10.1111/j.1750-3639.2005.tb00526.x
- Le Dieu-Lugon B, Dupré N, Legouez L, Leroux P, Gonzalez BJ, Marret S, Leroux-Nicollet I, Cleren C. 2020. Why considering sexual differences is necessary when studying encephalopathy of prematurity through rodent models. *Eur J Neurosci*. 52:2560-2574. doi: 10.1111/ejn.14664

## Supplementary figures

**Supplementary Figure 1.** Comparison of HI inductions/repressions amplitudes depending on kinetics of responses. **(A-B)** Median ( $\pm$  inter-quartiles) of fold change induction and repressions (noted as negative values) in P5 (A) and P10 (B) brains. **(C)** Correlation plot of maximum amplitudes in genes affected in common at P5 and P10. **(D)** Correlation plot of Regulation Index in genes affected in common at P5 and P10. **(E)** Comparison of medians of inductions (repressions) in whole P5 and P10 series of genes (colored) and in the restricted series of genes affected in common at the two ages (grey). \*,  $p < 0.05$ ; \*\*\*,  $p < 0.001$  according to Mann and Whitney test.

Supplementary Figure 1

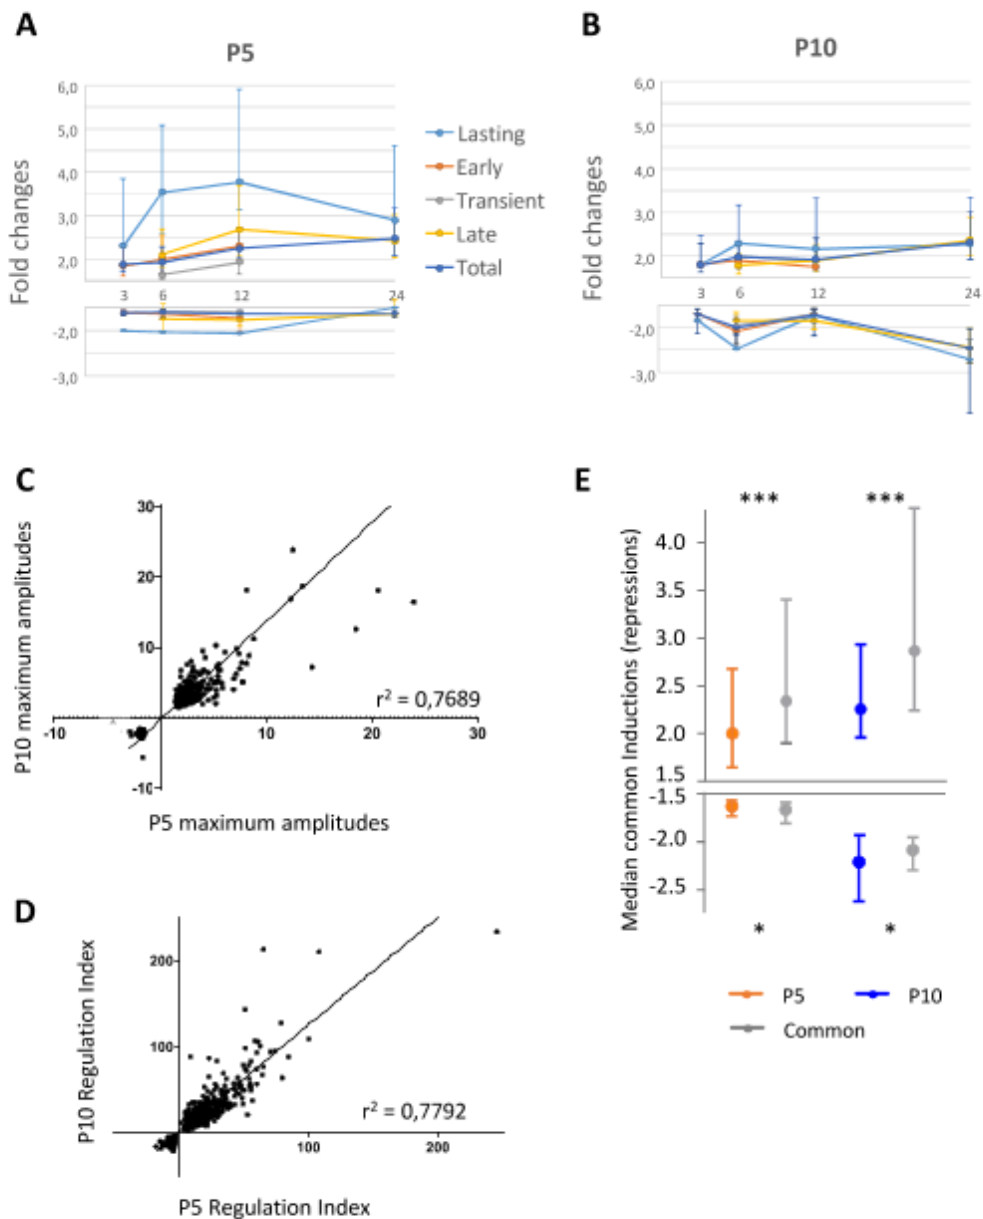

**Supplementary Figure 2.** Comparative distribution of age-specific and age-common effects of HI according to R-Index rankings in deciles. **(A)** P5 inductions, **(B)** P10 inductions, **(C)** P5 repressions, **(D)** P10 repressions. Inductions at P5 and P10 and repression at P10 exhibited significant enrichment in highest deciles of entities regulated in common at the 2 ages was observed amongst inductions at P5 ( $\chi^2 = 138.5$ , Df 9,  $p < 0.0001$ ), inductions at P10 ( $\chi^2 = 235.6$ , Df 9,  $p < 0.0001$ ), and repression at P10 ( $\chi^2 = 119.5$ , Df 9,  $p < 0.0001$ ), but not for repressions at P5 ( $\chi^2 = 9.863$ , Df 9,  $p = 0.3617$ ).

**Supplementary Figure 2**

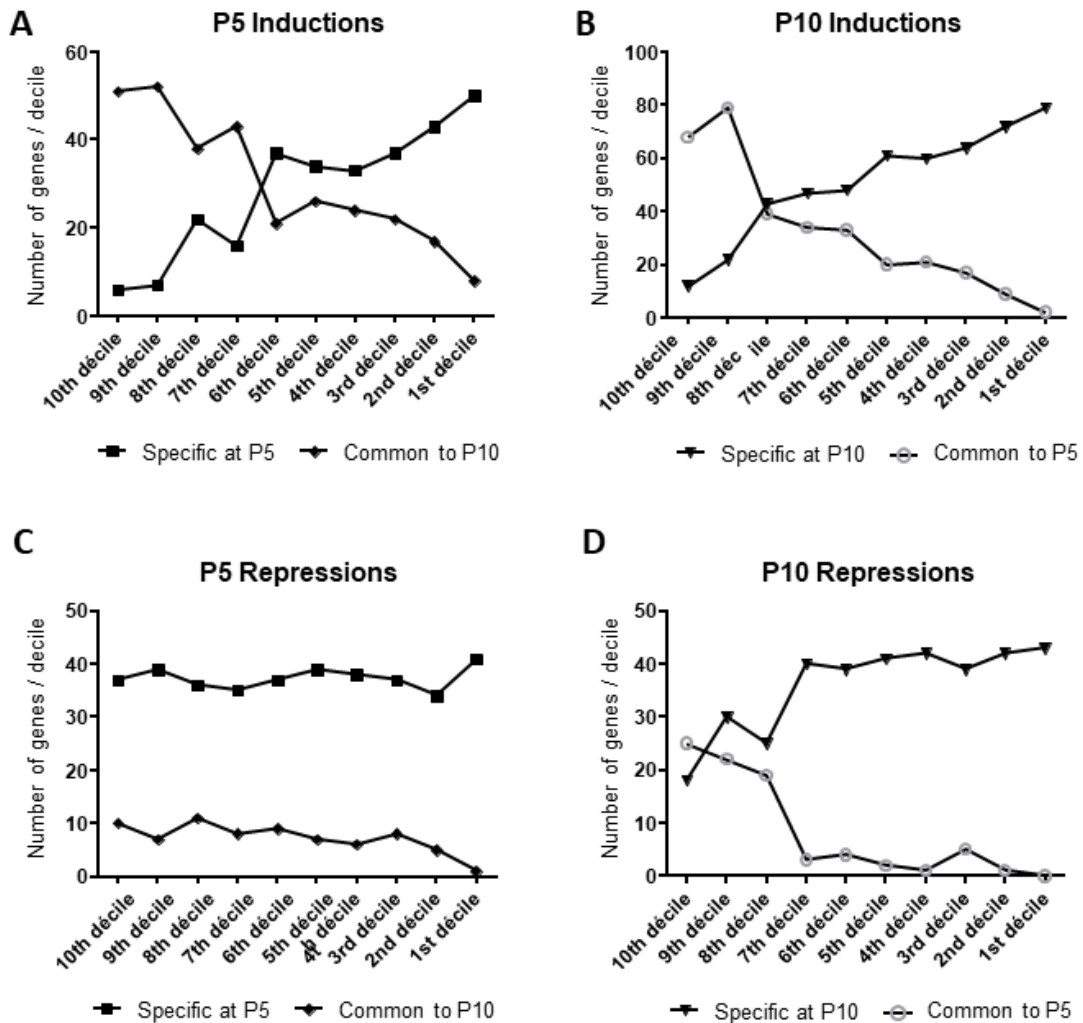

**Supplementary Figure 3.** Interaction of HI at P5 or P10 with developmentally regulated genes in postnatal period. **(A)** Volcano plots of spontaneous changes in gene expression during P2-P5, P5-P10, P10-P15 and P2-P15 periods (minimum amplitude 2X, p-value < 0.01 according to Bonferroni-Hochberg). **(B)** Schematic representation of HI-evoked gene expression at P5 co-incidence with previous (P2-P5) or subsequent (P5-P10) ontogenic evolution. **(C)** Schematic representation of HI-evoked gene expression at P10 co-incidence with previous (P5-P10) or subsequent (P10-P15) ontogenic evolution. **(D)** HI evoked effects in P5 mice in 4 classes of genes exhibiting distinct development regulation between P2 to P5. HI affected gene expression independently of ontogenic profiles ( $\text{Chi}^2 = 7.208$ , df 3,  $p = 0.0656$ ). **(E)** HI evoked effects in P10 mice in 4 classes of genes exhibiting distinct development regulation between P5 to P15. HI affected gene expression, mainly in the opposite sense of ontogenic profiles ( $\text{Chi}^2 = 320.1$ , df 3,  $p < 0.0001$ ).

### Supplementary Figure 3

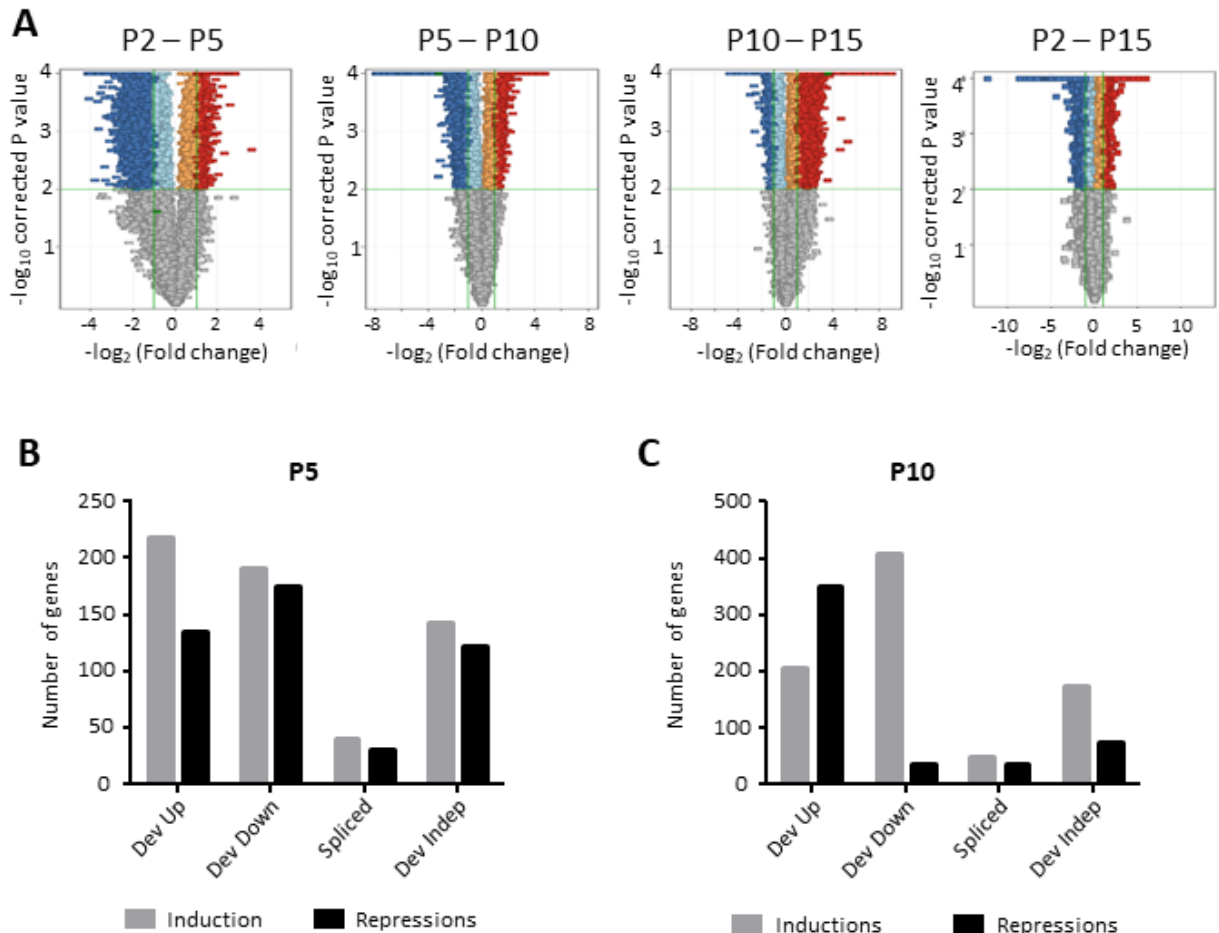



**Supplementary Figure 4.** Immunoblot quantitative determination of  $\beta$ -actin, VEGF and HIF-1 $\alpha$  in P5 or P10 mouse brain extracts 6 or 24h after HI. **(A)**  $\beta$ -actin detection in naïve P5 and P10 mice showed significant age related decreases. **(B)** HI at P5 or P10 did not induced  $\beta$ actin variation of expression. **(C)** VEGF-A monomer detection in naïve, P5 and P10 mice brains 6 and 24h. **(D)** VEGF-A-homodimer detection in the same blots as in C. **(E)** Time course evolution of VEGF monomer and dimer over 24h in P5 and P10 brains. **(F)** HIF-1 $\alpha$  detection in naïve, P5 and P10 mice brains 6 and 24h. **(G)** Illustration of protein array detection in a P10 brain at 24h after HI (exposure 60 min). \*;  $p < 0.05$  according to Student's t test (arrows indicate VEGF dots).

**Supplementary Figure 4**

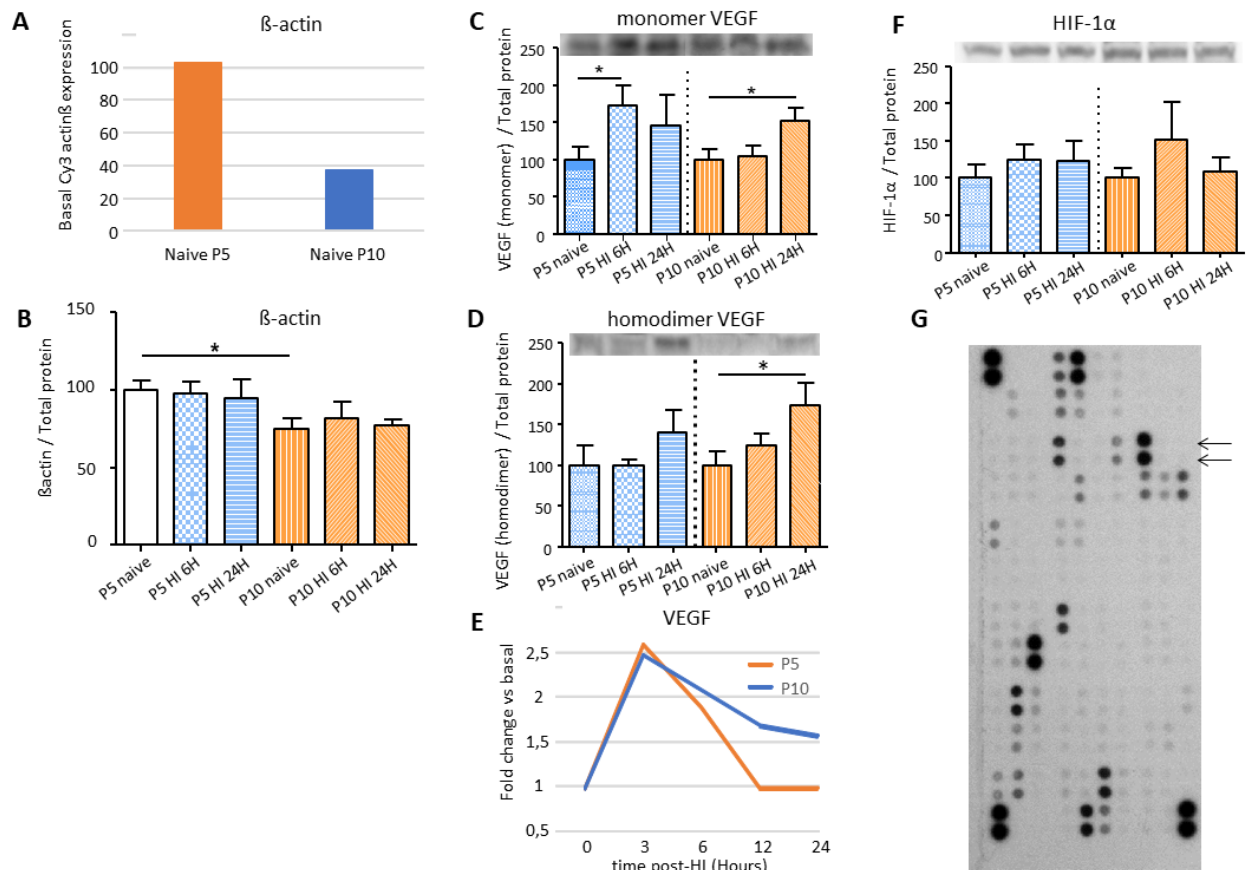

## Supplementary Tables

**Supplementary Table 1:** Exel Table containing all steps of gene extraction and lists is provided separately (Dupre et al Supplementary Table 1.xlsx).

**Supplementary Table 2.** Lists of genes induced after HI at P5, P10 and both ages with regulation index in the top- 10 (in the upper decile) at least at one age. Kinetics were defined in 4 classes; Lasting; detected from 3h to 24h, Early; observed 3h after HI and returned to their basal level before 24h, Transient; observed at 6h and/or 12 h after HI only, and Late; observed at first 6h or later after HI and remaining high after 24h. Parentheses indicate an index below the top 10 at the considered age. Bold characters indicate genes with R-Index in the top-10 at both ages.

| Inductions specific to P5     |                                                                                | P5    |           |       |          |
|-------------------------------|--------------------------------------------------------------------------------|-------|-----------|-------|----------|
| Gene Symbol                   | Gene Name                                                                      | Index | Kinetic   |       |          |
| Gdf15                         | growth differentiation factor 15                                               | 31    | Early     |       |          |
| Bcl3                          | B cell leukemia/lymphoma 3                                                     | 27    | Early     |       |          |
| Hspa1a                        | heat shock protein 1A                                                          | 27    | Early     |       |          |
| Wdr92                         | WD repeat domain 92                                                            | 24    | Early     |       |          |
| Ecm1                          | Extracellular matrix protein 1                                                 | 34    | Transient |       |          |
| Lilra6                        | Leukocyte immunoglobulin-like receptor, subfamily A (with TM domain), member 6 | 60    | Late      |       |          |
| Inductions at both P5 and P10 |                                                                                | P5    |           | P10   |          |
| Gene Symbol                   | Gene Name                                                                      | Index | Kinetic   | Index | Kinetic  |
| <b>Fos</b>                    | FBJ osteosarcoma oncogene                                                      | 246   | Lasting   | 233   | Lasting  |
| <b>Ccl4</b>                   | chemokine (C-C motif) ligand 4                                                 | 146   | Lasting   | 266   | Lasting  |
| <b>Ccl2</b>                   | chemokine (C-C motif) ligand 2                                                 | 108   | Lasting   | 210   | Lasting  |
| <b>Ccl12</b>                  | chemokine (C-C motif) ligand 12                                                | 100   | Lasting   | 109   | Late*    |
| <b>Cebpd</b>                  | CCAAT/enhancer binding protein (C/EBP), delta                                  | 84    | Lasting   | 88    | Lasting  |
| <b>Tnfrsf12a</b>              | tumor necrosis factor receptor superfamily, member 12a                         | 79    | Lasting   | 63    | Lasting  |
| <b>Mt2</b>                    | metallothionein 2                                                              | 79    | Lasting   | 127   | Lasting  |
| <b>Mt1</b>                    | metallothionein 1                                                              | 70    | Lasting   | 94    | Lasting  |
| <b>Atf3</b>                   | activating transcription factor 3                                              | 65    | Lasting   | 213   | Lasting  |
| <b>Cd14</b>                   | CD14 antigen                                                                   | 65    | Lasting   | 76    | Lasting  |
| <b>Pip5k1a</b>                | phosphatidylinositol-4-phosphate 5-kinase, type 1 alpha                        | 64    | Lasting   | 67    | Lasting  |
| <b>Lgals3</b>                 | lectin, galactose binding, soluble 3                                           | 62    | Lasting   | 100   | Lasting  |
| <b>Ccl3</b>                   | chemokine (C-C motif) ligand 3                                                 | 61    | Lasting   | 105   | Lasting  |
| <b>Lilrb4</b>                 | leukocyte immunoglobulin-like receptor, subfamily B, member 4                  | 61    | Lasting   | 88    | Lasting  |
| <b>Serpina3f</b>              | serine (or cysteine) peptidase inhibitor, clade A, member 3F                   | 56    | Lasting   | 37    | Lasting  |
| <b>Tubb6</b>                  | tubulin, beta 6 class V                                                        | 55    | Lasting   | 83    | Lasting  |
| <b>Ccl9</b>                   | chemokine (C-C motif) ligand 9                                                 | 53    | Lasting   | 78    | Lasting  |
| <b>Timp1</b>                  | tissue inhibitor of metalloproteinase 1                                        | 51    | Lasting   | 74    | Lasting  |
| <b>Neat1</b>                  | nuclear paraspeckle assembly transcript 1                                      | 47    | Lasting   | 54    | Lasting  |
| <b>Tuba1c</b>                 | tubulin, alpha 1C                                                              | 46    | Lasting   | 58    | Lasting  |
| <b>Plin2</b>                  | perilipin 2                                                                    | 45    | Lasting   | 64    | Lasting  |
| <b>Cyp1b1</b>                 | cytochrome P450, family 1, subfamily b, polypeptide 1                          | 43    | Lasting   | 33    | Lasting  |
| <b>Ier3</b>                   | immediate early response 3                                                     | 39    | Lasting   | 33    | Lasting  |
| <b>Lonrf3</b>                 | LON peptidase N-terminal domain and ring finger 3                              | 36    | Lasting   | 62    | Lasting  |
| <b>Plek</b>                   | pleckstrin                                                                     | 34    | Lasting   | 69    | Lasting  |
| <b>Tnfrsf1a</b>               | tumor necrosis factor receptor superfamily, member 1a                          | 33    | Lasting   | 49    | Lasting  |
| <b>Maff</b>                   | v-maf musculoaponeurotic fibrosarcoma oncogene family, protein F               | 28    | Lasting   | 53    | Lasting  |
| <b>Ctla2a</b>                 | cytotoxic T lymphocyte-associated protein 2 beta                               | 74    | Early     | 95    | Lasting* |
| <b>Egr1</b>                   | early growth response 1                                                        | 60    | Early     | 56    | Lasting* |
| <b>Jun</b>                    | jun proto-oncogene                                                             | 59    | Early     | 93    | Lasting* |
| <b>Cyr61</b>                  | cysteine rich protein 61                                                       | 58    | Early     | 106   | Lasting* |
| <b>Hspb1</b>                  | heat shock protein 1                                                           | 55    | Early     | 49    | Lasting* |
| <b>Nr4a1</b>                  | nuclear receptor subfamily 4, group A, member 1                                | 55    | Early     | 53    | Early    |
| <b>Anxa2</b>                  | annexin A2                                                                     | 55    | Early     | 57    | Lasting* |
| <b>Slc16a6</b>                | solute carrier family 16 (monocarboxylic acid transporters), member 6          | 52    | Early     | (21)  | Early    |
| <b>S100a9</b>                 | S100 calcium binding protein A9 (calgranulin B)                                | 52    | Early     | 71    | Lasting* |
| <b>Emp1</b>                   | epithelial membrane protein 1                                                  | 51    | Early     | 98    | Lasting* |

|                |                                                                                 |      |           |     |          |
|----------------|---------------------------------------------------------------------------------|------|-----------|-----|----------|
| <b>Ccl7</b>    | chemokine (C-C motif) ligand 7                                                  | 51   | Early     | 143 | Lasting* |
| <b>Ctla2b</b>  | cytotoxic T lymphocyte-associated protein 2 alpha                               | 50   | Early     | 49  | Early    |
| <b>Cited1</b>  | Cbp/p300-interacting transactivator with Glu/Asp-rich carboxy-terminal domain 1 | 49   | Early     | 33  | Early    |
| <b>Gadd45b</b> | growth arrest and DNA-damage-inducible 45 beta                                  | 48   | Early     | 50  | Lasting* |
| <b>Angptl4</b> | angiopoietin-like 4                                                             | 48   | Early     | 40  | Lasting* |
| <b>Gadd45g</b> | growth arrest and DNA-damage-inducible 45 gamma                                 | 48   | Early     | 54  | Lasting* |
| <b>Tagln2</b>  | transgelin 2                                                                    | 46   | Early     | 53  | Lasting* |
| <b>Fosb</b>    | FBJ osteosarcoma oncogene B                                                     | 44   | Early     | 47  | Lasting* |
| <b>Cebpb</b>   | CCAAT/enhancer binding protein (C/EBP), beta                                    | 42   | Early     | 57  | Lasting* |
| <b>Socs3</b>   | suppressor of cytokine signaling 3                                              | 42   | Early     | 50  | Lasting* |
| <b>Klf4</b>    | Kruppel-like factor 4 (gut)                                                     | 37   | Early     | 27  | Early    |
| <b>Btg3</b>    | B cell translocation gene 3                                                     | 37   | Early     | 34  | Early    |
| <b>Litaf</b>   | LPS-induced TN factor                                                           | 37   | Early     | 48  | Lasting* |
| <b>Hmox1</b>   | heme oxygenase (decycling) 1                                                    | 36   | Early     | 48  | Lasting* |
| <b>Slc2a1</b>  | solute carrier family 2 (facilitated glucose transporter), member 1             | 35   | Early     | 54  | Lasting* |
| <b>Slc10a1</b> | solute carrier family 10 (sodium/bile acid cotransporter family), member 1      | 32   | Early     | 49  | Early    |
| <b>S100a8</b>  | S100 calcium binding protein A8 (calgranulin A)                                 | 27   | Early     | 56  | Lasting* |
| <b>Egr2</b>    | early growth response 2                                                         | 27   | Early     | 49  | Lasting* |
| <b>Jund</b>    | jun D proto-oncogene                                                            | (22) | Early     | 48  | Lasting* |
| <b>Rnu1b6</b>  | U1b6 small nuclear RNA                                                          | 29   | Transient | 83  | Late     |
| <b>Tgm2</b>    | transglutaminase 2, C polypeptide                                               | 23   | Transient | 65  | Lasting* |
| <b>Ahnak</b>   | AHNAK nucleoprotein (desmoyokin)                                                | 59   | Late      | 73  | Lasting  |
| <b>Gpr84</b>   | G protein-coupled receptor 84                                                   | 54   | Late      | 54  | Late     |
| <b>Spp1</b>    | secreted phosphoprotein 1                                                       | 54   | Late      | 63  | Lasting  |
| <b>Vim</b>     | vimentin                                                                        | 49   | Late      | 78  | Lasting  |
| <b>Gfap</b>    | glial fibrillary acidic protein                                                 | 46   | Late      | 45  | Late     |
| <b>Ccl6</b>    | chemokine (C-C motif) ligand 6                                                  | 42   | Late      | 42  | Late     |
| <b>S100a4</b>  | S100 calcium binding protein A4                                                 | 40   | Late      | 31  | Late     |
| <b>S100a6</b>  | S100 calcium binding protein A6 (calcyclin)                                     | 38   | Late      | 30  | Late     |
| <b>Ifi202b</b> | interferon activated gene 202B                                                  | 23   | Late      | 86  | Lasting  |
| <b>Ctsz</b>    | cathepsin Z                                                                     | (19) | Late      | 53  | Lasting  |

### Inductions specific to P10

P10

| Gene Symbol | Gene Name                                                          | Index | Kinetic   |
|-------------|--------------------------------------------------------------------|-------|-----------|
| Actb        | actin, beta                                                        | 36    | Lasting   |
| Actg1       | actin, gamma, cytoplasmic 1                                        | 28    | Lasting   |
| Ctsb        | cathepsin B                                                        | 30    | Lasting   |
| Dpysl3      | dihydropyrimidinase-like 3                                         | 29    | Lasting   |
| Eno1        | enolase 1, alpha non-neuron                                        | 26    | Lasting   |
| Saa3        | serum amyloid A 3                                                  | 67    | Lasting   |
| Stfa211     | <i>cysteine-type endopeptidase inhibitor activity</i> <sup>#</sup> | 38    | Lasting   |
| Glr2        | glutaredoxin 2 (thioltransferase)                                  | 30    | Transient |
| Rn4,5s      | 4,5S RNA                                                           | 28    | Transient |
| ND2         | NADH dehydrogenase subunit 2                                       | 26    | Late      |
| ND4L        | NADH dehydrogenase subunit 4L                                      | 26    | Late      |
| Ndor1       | NADPH-dependent diflavin oxidoreductase 1                          | 26    | Biphasic  |

### Footnotes Supplementary Table 2

Index amplitudes varied from 1.5 to 246 in the 593 inductions recorded at P5 and from 1.5 to 424 in the 840 inductions recorded at P10. Bold characters indicate genes exhibiting R-index in the 1st decile at the 2 ages. \*; delayed regulation at P10, #; *molecular function for MGC130173 submitted name.*

**Supplementary Table 3.** Lists of genes repressed after HI at P5 and/or P10 with regulation index in the lowest decile (highest negative amplitude) at least at one age. Kinetics were defined in 4 classes: Lasting; detected from 3h to 24h, Early; observed 3h after HI and returned to basal level before 24h, Transient; observed at 6h and/or 12 h after HI only, and Late; observed at first 6h or later after HI and remaining high after 24h. Parentheses indicate index below the top 10 at the considered age. Bold characters indicate genes with RI in the first decile at both ages.

| Repressions specific to P5 |                                                                             | P5    |           |
|----------------------------|-----------------------------------------------------------------------------|-------|-----------|
| Gene Symbol                | Gene Name                                                                   | Index | Kinetics  |
| Lrrc55                     | leucine rich repeat containing 55                                           | -18   | Early     |
| Slc22a8                    | solute carrier family 22 (organic anion transporter), member 8              | -13   | Early     |
| Actg2                      | actin, gamma 2, smooth muscle, enteric                                      | -11   | Early     |
| Tlr12                      | toll-like receptor 12                                                       | -11   | Early     |
| Bcl11b                     | B cell leukemia/lymphoma 11B                                                | -10   | Early     |
| Tubb4b                     | tubulin, beta 4B class IVB                                                  | -14   | Transient |
| Mvd                        | mevalonate (diphospho) decarboxylase                                        | -12   | Transient |
| Grm7                       | glutamate receptor, metabotropic 7                                          | -12   | Transient |
| Robo2                      | Roundabout homolog 2                                                        | -12   | Transient |
| Elov16                     | ELOVL family member 6, elongation of long chain fatty acids                 | -11   | Transient |
| Erbb4                      | v-erb-a erythroblastic leukemia viral oncogene homolog 4                    | -11   | Transient |
| Fam19a1                    | family with sequence similarity 19, member A1                               | -10   | Transient |
| Palm2                      | paralemmin 2                                                                | -10   | Transient |
| Tmem74b                    | transmembrane protein 74B                                                   | -10   | Transient |
| Tubb3                      | tubulin, beta 3 class III                                                   | -25   | Late      |
| Tubb5                      | tubulin, beta 5 class I                                                     | -25   | Late      |
| Sqle                       | squalene epoxidase                                                          | -23   | Late      |
| Msmo1                      | methylsterol monoxygenase 1                                                 | -21   | Late      |
| Tuba1a                     | tubulin, alpha 1A                                                           | -19   | Late      |
| Tuba4a                     | tubulin, alpha 4A                                                           | -16   | Late      |
| Hmgcs1                     | 3-hydroxy-3-methylglutaryl-Coenzyme A synthase 1                            | -16   | Late      |
| Idi1                       | Isopentenyl-diphosphate Delta-isomerase 1                                   | -15   | Late      |
| Mvk                        | mevalonate kinase                                                           | -15   | Late      |
| Btdb9                      | BTB (POZ) domain containing 9                                               | -15   | Late      |
| Ldlr                       | low density lipoprotein receptor                                            | -14   | Late      |
| Oxct1                      | 3-oxoacid CoA transferase 1                                                 | -14   | Late      |
| Fdps                       | farnesyl diphosphate synthetase                                             | -13   | Late      |
| Itpka                      | inositol-trisphosphate 3-kinase A                                           | -11   | Late      |
| Tm7sf2                     | transmembrane 7 superfamily member 2                                        | -11   | Late      |
| Kcnh5                      | Potassium voltage-gated channel subfamily H member 5                        | -11   | Late      |
| Kcnb2                      | Potassium voltage-gated channel subfamily B member 2                        | -11   | Late      |
| Gabrd                      | gamma-aminobutyric acid (GABA) A receptor, subunit delta                    | -11   | Late      |
| Zcchc16                    | zinc finger, CCHC domain containing 16                                      | -10   | Late      |
| Egr4                       | early growth response 4                                                     | -10   | Late      |
| Slc6a4                     | solute carrier family 6 (neurotransmitter transporter, serotonin), member 4 | -10   | Late      |
| Idh1                       | isocitrate dehydrogenase 1 (NADP+), soluble                                 | -10   | Late      |
| Crhr1                      | corticotropin releasing hormone receptor 1                                  | -10   | Late      |

| Repressions at both P5 and P10 |                                                                           | P5    |           | P10   |           |
|--------------------------------|---------------------------------------------------------------------------|-------|-----------|-------|-----------|
| Gene Symbol                    | Gene Name                                                                 | Index | Kinetic   | Index | Kinetic   |
| <b>Tmsb15b1</b>                | thymosin beta 15b1                                                        | -14   | Lasting   | -18   | Late      |
| <b>Kcns3</b>                   | potassium voltage-gated channel, delayed-rectifier, subfamily S, member 3 | -12   | Early     | -14   | Early     |
| P2ry13                         | purinergic receptor P2Y, G-protein coupled 13                             | -12   | Early     | -12   | Early     |
| <b>Slc16a7</b>                 | solute carrier family 16 (monocarboxylic acid transporters), member 7     | -13   | Transient | -13   | Transient |
| <b>Nrxn3</b>                   | neurexin III                                                              | -12   | Transient | -14   | Transient |
| <b>Izumo4</b>                  | IZUMO family member 4                                                     | -10   | Transient | -15   | Late      |
| <b>P2ry12</b>                  | purinergic receptor P2Y, G-protein coupled 12                             | -18   | Late      | -16   | Late      |
| Anks1b                         | ankyrin repeat and sterile alpha motif domain containing 1B               | -15   | Late      | (-10) | Transient |

| Nsdhl                              | NAD(P) dependent steroid dehydrogenase-like                        | -14  | Late      | (-11) | Late       |
|------------------------------------|--------------------------------------------------------------------|------|-----------|-------|------------|
| <b>Slc2a5</b>                      | solute carrier family 2 (facilitated glucose transporter) member 5 | -13  | Late      | -15   | Late       |
| Tescl                              | tescalcin-like                                                     | (-3) | Early     | -18   | Lasting    |
| Slitrk6                            | SLIT and NTRK-like family, member 6                                | (-8) | Early     | -16   | Early      |
| Dsel                               | dermatan sulfate epimerase-like                                    | (-5) | Transient | -21   | Lasting    |
| Ccdc167                            | coiled-coil domain containing 167                                  | (-4) | Transient | -21   | Lasting    |
| Slc40a1                            | solute carrier family 40 (iron-regulated transporter), member 1    | (-4) | Transient | -17   | Early      |
| Rhcg <sup>#</sup>                  | Rhesus blood group-associated C glycoprotein                       | (-5) | Transient | -15   | Early      |
| Tnfaip8                            | tumor necrosis factor, alpha-induced protein 8                     | (-8) | Early     | -14   | Early      |
| Rsl1                               | regulator of sex limited protein 1                                 | (-7) | Early     | -14   | Early      |
| Fzd10                              | frizzled homolog 10 (Drosophila)                                   | (-8) | Transient | -14   | Early      |
| Bola1                              | bolA-like 1 (E. coli)                                              | (-4) | Transient | -14   | Early      |
| Kcne2                              | potassium voltage-gated channel, Isk-related subfamily, gene 2     | (-4) | Early     | -14   | Early      |
| Tnfrsf25                           | tumor necrosis factor receptor superfamily, member 25              | (-4) | Early     | -12   | Early      |
| Caps2                              | calcyphosphine 2                                                   | (-3) | Transient | -12   | Early      |
| Hes5                               | hairy and enhancer of split 5 (Drosophila)                         | (-7) | Transient | -18   | Transient  |
| Rxrg                               | retinoid X receptor gamma                                          | (-7) | Transient | -14   | Transient  |
| Gria2                              | glutamate receptor, ionotropic, AMPA2 (alpha 2)                    | (-8) | Transient | -12   | Transient  |
| Ntng1                              | netrin G1                                                          | (-5) | Transient | -13   | Transient  |
| Gucy1a2                            | guanylate cyclase 1, soluble, alpha 2                              | (-5) | Transient | -13   | Transient  |
| Pclo                               | piccolo (presynaptic cytomatrix protein)                           | (-6) | Transient | -12   | Transient  |
| Spink8                             | serine peptidase inhibitor, Kazal type 8                           | (-4) | Transient | -13   | Late       |
| <b>Repressions specific to P10</b> |                                                                    |      |           |       | <b>P10</b> |
| Gene Symbol                        | Gene Name                                                          |      |           | Index | Kinetic    |
| Mkks                               | McKusick-Kaufman syndrome                                          |      |           | -17   | Early      |
| Frmpd4                             | FERM and PDZ domain containing 4                                   |      |           | -17   | Early      |
| Tmem107                            | transmembrane protein 107                                          |      |           | -16   | Early      |
| Myh10                              | myosin, heavy polypeptide 10, non-muscle                           |      |           | -16   | Early      |
| Ctnbp2                             | cortactin binding protein 2                                        |      |           | -16   | Early      |
| Zfp950                             | zinc finger protein 950                                            |      |           | -15   | Early      |
| Zfp961                             | zinc finger protein 961                                            |      |           | -15   | Early      |
| Zfp273                             | zinc finger protein 273                                            |      |           | -14   | Early      |
| Zfp945                             | zinc finger protein 945                                            |      |           | -13   | Early      |
| Tmem212                            | transmembrane protein 212                                          |      |           | -13   | Early      |
| Gpr34                              | G protein-coupled receptor 34                                      |      |           | -13   | Early      |
| Krcc1                              | lysine-rich coiled-coil 1                                          |      |           | -12   | Early      |
| Pcsk2                              | proprotein convertase subtilisin/kexin type 2                      |      |           | -18   | Late       |
| Sphkap                             | SPHK1 interactor, AKAP domain containing                           |      |           | -16   | Late       |
| Kbtbd7                             | kelch repeat and BTB (POZ) domain containing 7                     |      |           | -13   | Late       |
| Tmsb15l                            | thymosin beta 15b like                                             |      |           | -13   | Late       |

### Footnotes Supplementary Table 3

Index amplitudes varied from -25 to -1.5 in the whole 466 repressions recorded at P5, and from -21 to -1.4 in the 499 repressions recorded at P10. Bold characters indicate genes exhibiting R-index in the 1st decile at the 2 ages.

| Common to P5 and P10       |                                 | P5    |       | P10   |       |
|----------------------------|---------------------------------|-------|-------|-------|-------|
| Gene                       | Protein                         | 6h    | 24h   | 6h    | 24h   |
| <b>Spp1</b>                | Osteopontin (OPN)               | 1,59  | 8,33  |       | 18,99 |
| Mpo                        | Myeloperoxidase                 |       | 3,38  |       | 8,79  |
| <b>Ccl12</b>               | CCL12 MCP5                      |       | 2,65  |       | 7,39  |
| Igfbp1                     | IGFBP-1                         |       | 2,35  |       | 2,04  |
| Igfbp3                     | IGFBP3                          |       | 2,33  |       | 2,31  |
| Icam1                      | ICAM-1/CD54                     |       | 2,29  |       | 2,78  |
| <b>Lcn2</b>                | Lipocalin-2/NGAL                |       | 2,00  | 2,12  | 3,73  |
| Ccl1                       | CCL1-Eotaxin                    |       | 1,80  |       | 6,11  |
| Crp                        | C-Reactive protein              | 3,50  | lost  |       | 1,95  |
| C1q                        | C1qR1/CD93                      |       | 1,96  | -1,58 | 1,76  |
| Il10                       | IL10                            |       | 1,60  | 1,51  |       |
| Cfd                        | Complement factor D             |       | 1,57  |       | 1,59  |
| Cxcl2                      | CXCL2/MIP-2                     |       | 1,53  |       | 1,67  |
| <i>Il1b</i> <sup>#</sup>   | IL-1 $\beta$ /IL-1F2            | -3,36 |       | -1,55 |       |
| Eng                        | Endoglin/CD105                  | -2,08 |       | -2,62 |       |
| Inf12                      | IL28A/B                         | -1,56 |       | -1,53 |       |
| <i>Ccl17</i> <sup>*</sup>  | CCL17/TARC                      | -1,60 |       | -1,77 |       |
| <b>Ccl2</b>                | CCL2/JE/MCP1                    | -1,86 |       | -1,53 |       |
| <b>Cd14</b>                | CD14                            |       | 2,14  | -2,01 |       |
| Ccl22                      | CCL22/MDC                       |       | 1,86  | -1,79 |       |
| Ccl19                      | CCL19/MIP-3 $\beta$             |       | 1,81  | -1,72 |       |
| Tnfrsf11b                  | Osteoprotegerin                 |       | 1,77  | -1,64 |       |
| Tymp                       | PD-ECGF/thymidine phosphorylase |       | 1,67  | -1,82 |       |
| Cxcl1                      | Growth-regulated alpha protein  |       | 1,57  | -1,62 |       |
| <i>Ldlr</i> <sup>#</sup>   | LDL-R                           |       | 1,51  | -1,85 |       |
| Il6                        | IL6                             | -2,28 |       | 1,86  |       |
| <b>Cxcl16</b> <sup>*</sup> | CXCL16                          | -2,18 |       |       | 1,53  |
| <i>Serpine1</i>            | Serpin E1/PAI-1                 | -1,78 |       |       | 2,21  |
| Specific to P5             |                                 | 6h    | 24h   |       |       |
| Reg3g                      | Reg3G                           | 1,69  | 2,87  |       |       |
| Apcs                       | Pentraxin 2/SAP                 |       | 2,31  |       |       |
| Il7                        | IL7                             |       | 1,93  |       |       |
| <b>Csf1</b>                | M-CSF                           |       | 1,90  |       |       |
| Csf2                       | GM-CSF                          |       | 1,89  |       |       |
| Lif                        | LIF                             |       | 1,85  |       |       |
| Dkk1                       | DKK-1                           |       | 1,77  |       |       |
| <i>Gdf15</i>               | GDF15                           | -3,47 | -1,51 |       |       |
| Il17a                      | IL17A                           | -8,35 |       |       |       |
| Postn                      | Periostin/OSF-2                 | -4,03 |       |       |       |
| C5                         | Complement C5/C5a               | -2,82 |       |       |       |
| Cd160                      | CD160                           | -1,92 |       |       |       |
| <i>Vegfa</i>               | VEGF                            | -1,88 |       |       |       |
| Mmp9                       | MMP9                            | -1,85 |       |       |       |
| Thpo                       | Thrombopoietin                  | -1,75 |       |       |       |
| Specific to P10            |                                 | 6h    | 24h   |       |       |
| <b>Ccl5</b>                | CCL5/RANTES                     | 2,17  | 2,96  |       |       |
| Sele                       | E-selectin/CD26E                | 1,58  | 2,94  |       |       |
| Chi3l1                     | Chitinase-3-like 1              |       | 4,35  |       |       |
| Ccl6                       | CL6/C10                         |       | 3,68  |       |       |
| Cxcl10                     | CXCL10/IP10                     |       | 2,32  |       |       |
| <b>Angpt2</b>              | Angiopoietin-2                  |       | 2,17  |       |       |
| Ptx3                       | Pentraxin 3/Tsg-14              |       | 1,92  |       |       |
| Rarres2                    | Chemerin                        |       | 1,90  |       |       |
| Wisp1                      | WISP-1/CCN4                     |       | 1,78  |       |       |
| Lep                        | Leptin                          |       | 1,78  |       |       |
| Areg                       | Amphiregulin                    | -2,04 | -2,05 |       |       |
| Mmp3                       | MMP-3                           | -1,82 |       |       |       |

**Supplementary Table 4:** Protein arrays at 6 and 24 h after HI in P5 and P10 brains. Values indicate fold change vs naïve animal levels. Negative values indicate decreased levels. Bold characters indicate coherent observation with transcriptome observation. Italics indicate protein variation opposite to transcriptome observations at P5 (\*) and/or P10 (#).
